# Supplementary material
Source: publisher figshare collection journal article supplement (https://karger.figshare.com/ndownloader/files/25671740)
Supplement: Supplementary file 1 [file 25671740]

| Characteristics | Control | CA | P value  (Student *t* test) |
| --- | --- | --- | --- |
| Sex  (number) | Female: 5  Male: 5 | Female: 11  Male: 19 | — |
| Recurrent wheezing (yes or no) | no | yes | — |
| Years of age | 7.3 ± 2.6 | 7 ± 1.8 | 0.69 |
| Height  (cm) | 126.2 ± 14.9 | 126.9 ± 11.01 | 0.87 |
| FEV1  (%；β2 agonist) | 1% ± 2.48% | 15% ± 3% | < 0.001 |
| Serum IgE  (IU/mL) | 32.4 ± 16.3 | 354.4 ± 237.4 | < 0.001 |

**Table s1 Clinic characteristics (for real-time qPCR assay).**

Data were presented as mean ± SD. A p value less than 0.05 was considered significant.
